# Supplementary material for: Dimeric self-association of an isophthalamide macrocycle in solution and the solid state
Source: Royal Society of Chemistry journal article supplement (doi:10.1039/c1ce05271c), 2011-01-01
Supplement: c1ce05271c.pdf [file c1ce05271c.pdf]

# Dimeric Self-Association of an Isophthalamide Macrocycle in Solution and the Solid State

*Christopher J. Serpell, \* Owen Thomas, Barbara Odell, Timothy D. W. Claridge, Ricky Chall, Amber L. Thompson, and Paul D. Beer*

Chemistry Research Laboratory, Department of Chemistry, University of Oxford,  
Mansfield Road, Oxford, OX1 3TA, UK  
E-mail: chris.serpell@gmail.com

## Contents

|                                             |   |
|---------------------------------------------|---|
| <b>Crystallisation Conditions</b>           | 2 |
| <b>X-ray Data Collection and Refinement</b> | 2 |
| <b>Hirschfeld Fingerprint Plots</b>         | 3 |
| <b>Solution NMR Studies</b>                 | 4 |
| <b>References</b>                           | 5 |

## Crystallisation Conditions

*Polymorph I:* An equimolar solution of macrocycle **1** and crystallisation agent **2** were dissolved in minimum acetonitrile. The vial was closed with a pierced lid and placed within a second sealed vial containing diisopropyl ether, allowing slow gaseous diffusion of the outer solvent into the sample vial. Plate-like colourless crystals grew over the course of a few days.

*Polymorph II:* This was obtained upon repetition of the procedure for Polymorph I, giving colourless block-like crystals.

*Polymorph III:* The procedure was the same as that reported for Polymorph I, but using **3** instead of **2**, yielding colourless block-like crystals coated in a brown oil, presumably consisting primarily of **3**.

*Methanol solvate:* A portion of macrocycle **1** was added to methanol, in which it is poorly soluble at room temperature. Heating of the mixture resulted in a colourless solution which produced needle-like colourless crystals upon slow cooling to room temperature.

*Dichloromethane solvate:* The slow diffusion procedure described for Polymorph I was used, with **4** acting as the crystallisation agent, and a 1:1 mixture of dichloromethane and acetone taking the place of the acetonitrile. Colourless plate-like crystals were obtained.

*Iodopentafluorobenzene solvate:* A 1:1 mixture of macrocycle **1** and tetrabutylammonium chloride was dissolved in minimum iodopentafluorobenzene. This required heating, although the solution was then stable at room temperature. The vial was closed with a pierced cap and placed in a second sealed vial containing diisopropyl ether. Gaseous diffusion of this solvent into the first vial gave colourless needle-like crystals.

*Acetone solvate:* The procedure was as for Polymorph I, using a 1:1:1 mixture of **1**, **5**, and tetrabutylammonium chloride in acetone, into which diisopropyl ether was diffused. Colourless plate-like crystals were obtained.

*Acetonitrile solvate:* The procedure was as for Polymorph I, omitting the crystallisation agent, giving large colourless block-like crystals, which were repeatedly the same structure.

## X-Ray Data Collection and Refinement

Single crystal X-ray diffraction data were collected either using graphite monochromated Mo K $\alpha$  radiation ( $\lambda = 0.71073 \text{ \AA}$ ) on a Nonius KappaCCD diffractometer, or (as specified in Table 1) using silicon double crystal monochromated synchrotron radiation ( $\lambda = 0.68890 \text{ \AA}$ ) at Diamond Light Source beamline I19 on a custom built Rigaku diffractometer. Both diffractometers were equipped with a Cryostream N<sub>2</sub> open-flow cooling device,<sup>1</sup> and the data were collected at 150(2) K.

If using the Nonius machine, series of  $\omega$ -scans were performed in such a way as to collect every independent reflection to a maximum resolution of  $0.77 \text{ \AA}$ , aiming for 99.5 % completeness. Cell parameters and intensity data (including inter-frame scaling) were processed using the DENZO-SMN package.<sup>2</sup>

When using synchrotron radiation,  $\omega$ -scans were performed such that a half-sphere of data was collected to a maximum resolution of  $0.77 \text{ \AA}$ . Cell refinement, data reduction, and scaling were performed using the CrystalClear package.<sup>3</sup>

The structures were solved by direct methods using the SIR92 software<sup>4</sup> or by charge flipping using Superflip.<sup>5</sup> The structures were refined using full-matrix least-squares on F<sup>2</sup> within the CRYSTALS suite.<sup>6</sup> All non-hydrogen atoms were refined with anisotropic displacement parameters. Disordered portions were modelled using refined partial occupancies. Geometric and vibrational restraints were applied where appropriate to ensure physically reasonable models. The H atoms were usually located in the difference map, but those attached to carbon atoms were repositioned geometrically. Protic H atoms which could not be located in the difference map were positioned to satisfy hydrogen bonding requirements. The H atoms were initially refined with soft restraints on the bond lengths and angles to regularise their geometry (C-H in the range  $0.93\text{-}0.98 \text{ \AA}$ , N-H in the range  $0.86\text{-}0.89 \text{ \AA}$ , and O-H =  $0.82 \text{ \AA}$  and isotropic displacement factors in the range 1.2-1.5 times  $U_{\text{eq}}$  of the parent atom), after which the positions were refined with riding constraints. After the construction of a stable, physically reasonable, and complete model, the weights were optimised,<sup>7,8</sup> anomalous reflections were omitted, and absent high-angle data (in the case of poorly diffracting samples) was pruned using the Wilson plot.

IUCr CheckCIF/PLATON<sup>9</sup> was used to validate the structures, and warnings were dealt with as appropriate or justified using validation reply forms.

Full crystallographic data can be found in the cifs.

## Hirschfeld Fingerprint Plots

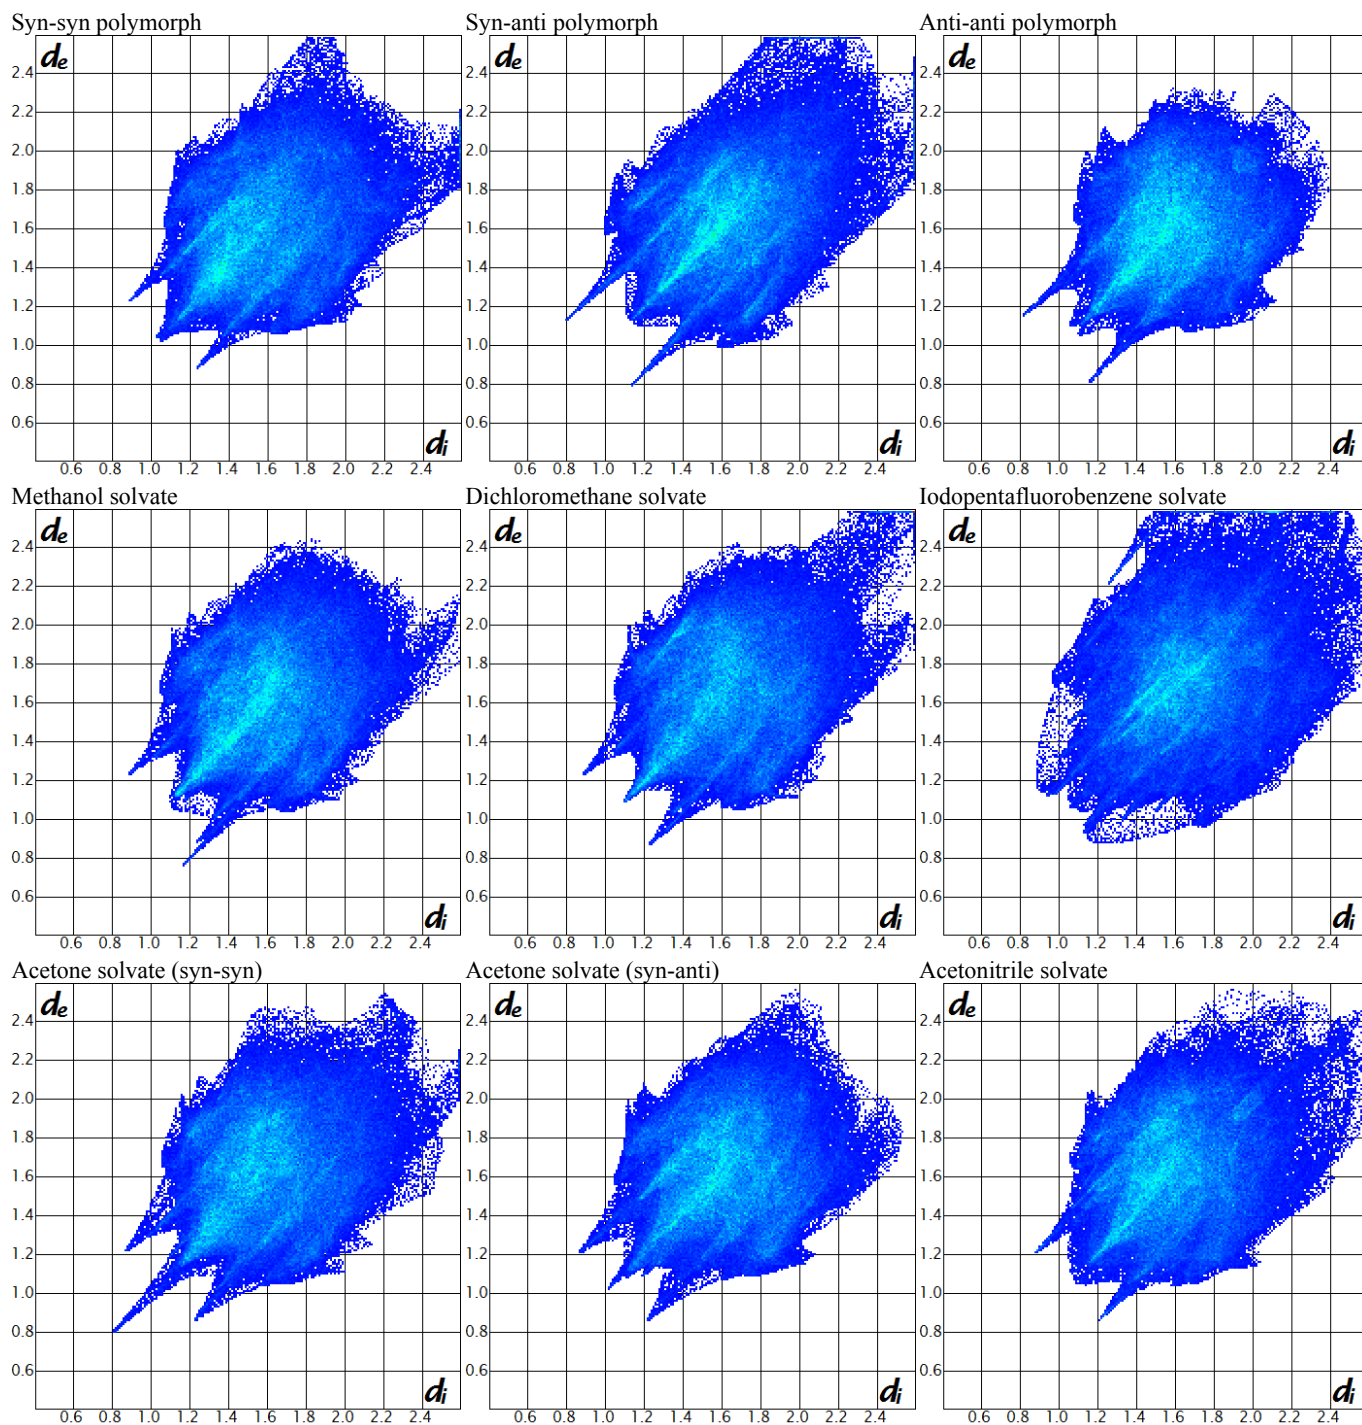

**Figure S1** – Hirschfeld fingerprint plots for the crystal structures presented in this paper. The Hirschfeld surface fingerprint plots all display characteristic ‘wing-tips’ for short H – O contacts. In the iodopentafluorobenzene and acetone syn-syn cases these are obscured somewhat by disorder in the crystal structure.



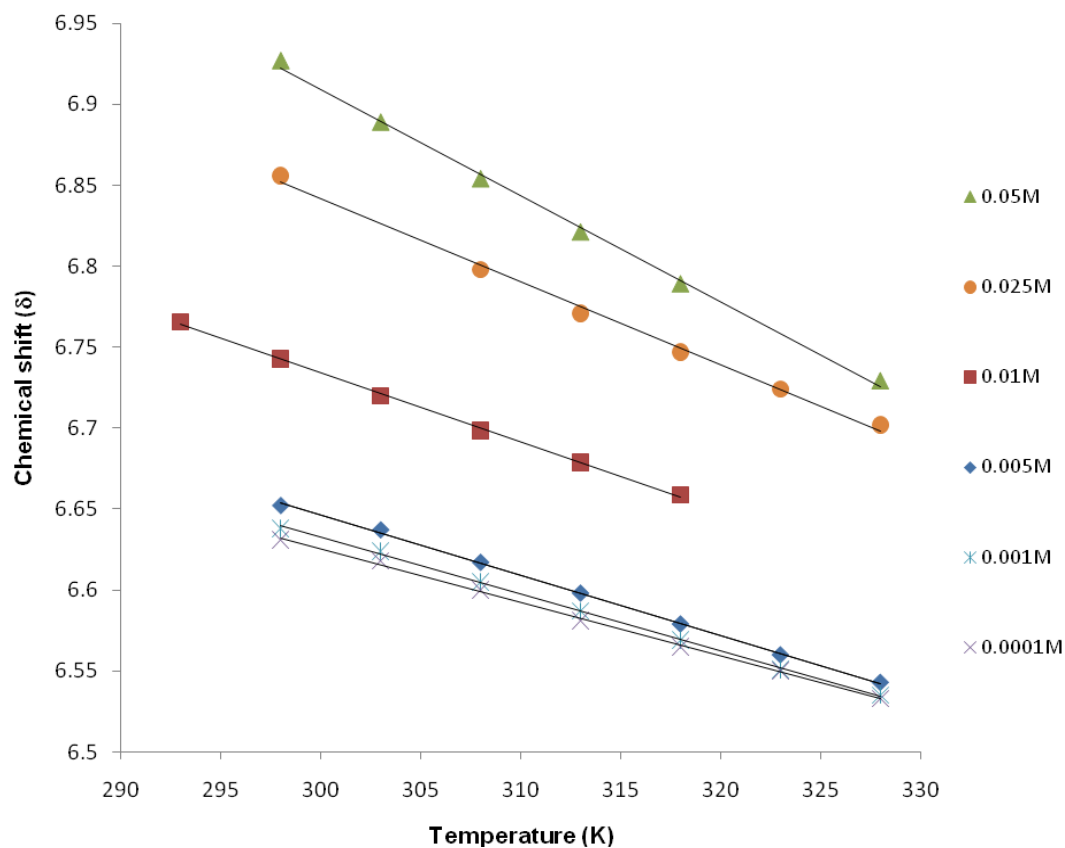

**Figure S3** – Amide proton chemical shift temperature dependences across a series of solution concentrations. Temperature coefficients  $\Delta\delta_T$  are derived from the slopes of linear regression fits and are presented in Fig 6.

## References

1. J. Cosier and A. M. Glazer, *J. Appl. Cryst.*, 1986, **19**, 105-107.
2. Z. Otwinowski and W. Minor, *Processing of X-ray Diffraction Data Collected in Oscillation Mode*, Academic Press, 1997.
3. , Rigaku, 2009.
4. A. Altomare, G. Cascarano, C. Giacovazzo, A. Guagliardi, M. C. Burla, G. Polidori and M. Camalli, *J. Appl. Cryst.*, 1994, **27**, 435.
5. L. Palatinus and G. Chapuis, *J. Appl. Cryst.*, 1997, **40**, 786-790.
6. P. W. Betteridge, J. R. Carruthers, R. I. Cooper, K. Prout and D. J. Watkin, *J. Appl. Cryst.*, 2003, **36**, 1487.
7. J. R. Carruthers and D. J. Watkin, *Acta Cryst.*, 1979, **A35**, 698-699.
8. D. J. Watkin, *Acta Cryst.*, 1994, **A50**, 411-437.
9. J. C. C. Chen and I. J. B. Lin, *J. Chem. Soc., Dalton Trans.*, 2000, 839-840.
10. D. Wu, A. Chen and C. S. Johnson, *J. Magn. Reson. (A)*, 1995, **115**, 260-264.
